# Supplementary material
Source: PubMed Central journal article supplement (PMC7685544)
Supplement: JB.00134-20-s0001.pdf [file JB.00134-20-s0001.pdf]

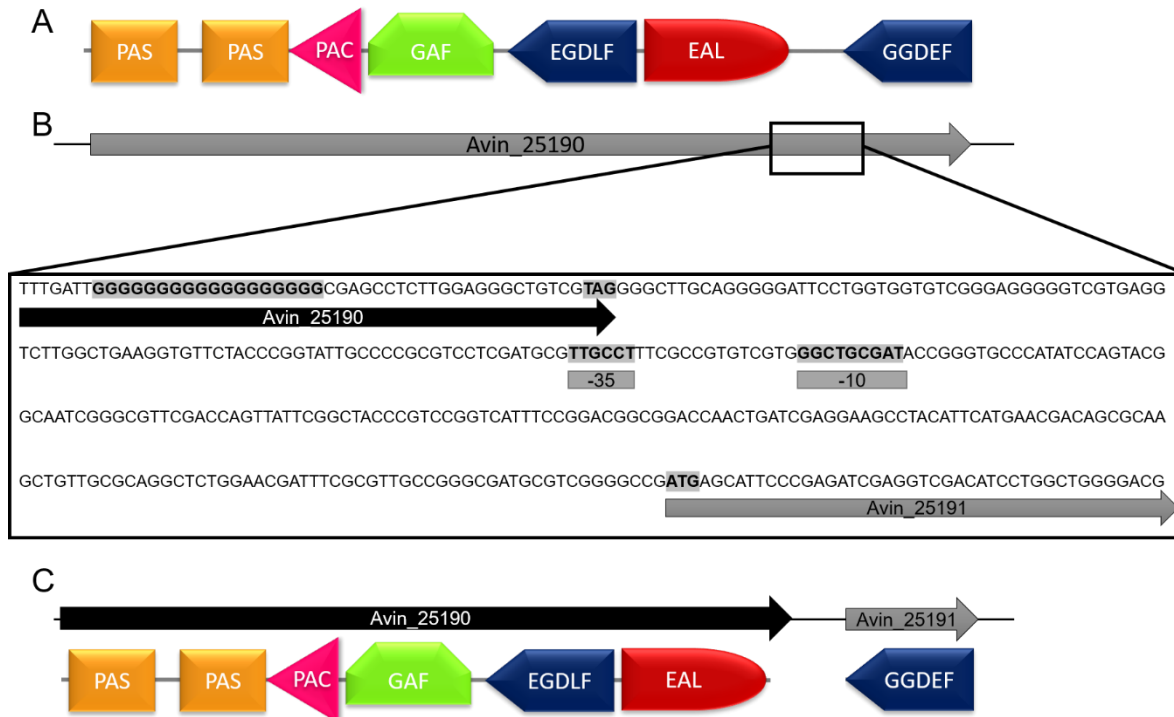

**Figure S1.** Analysis of the *Avin\_25190* locus of *A. vinelandii*. A. Predicted domain architecture of the annotated *Avin\_25190* encoded protein in the genome of strain DJ (NCBI genome, RefSeq: NC\_012560.1). B. DNA sequence analysis of ORF *Avin\_25190*. DNA sequence analysis of *Avin\_25190* in strain AEIV led us to identify two independent ORFs (named *Avin\_25190* and *Avin\_25191*) having an intergenic region of 301 bp. The error in the original annotation in strain DJ was derived from a frameshift caused by the absence of a guanine residue in a poly-G region (highlighted in grey), right before the stop codon (TAG) of the first ORF. A predicted  $\sigma^{70}$  promoter driving transcription of *Avin\_25191* was identified, using the Soft Berry BPROM program (1). C. Domain architecture of the final *Avin\_25190* and *Avin\_25191* encoded proteins in the genome of strain AEIV.

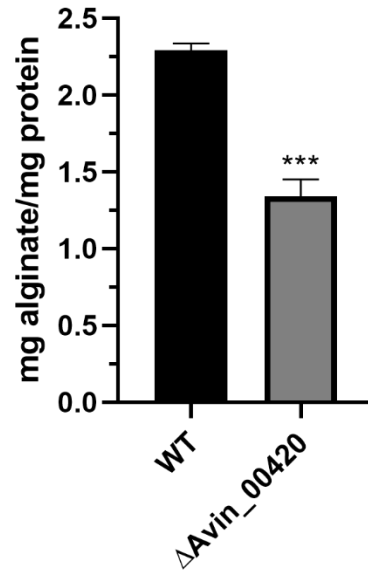

**Figure S2.** Alginate quantification in the ATCC 9046 *A. vinelandii* strain (black bar) and its derivative carrying a deletion of the *Avin\_00420* gene ( $\Delta$ *Avin\_00420*; grey bar), encoding the DGC *AvGReg*. Cells were cultured in Burk<sup>2</sup>-sucrose medium for 48 h. Means and standard deviation from three independent experiments are shown. Significant differences were analyzed by *t*-test. Statistical significance is indicated (\*\*\*) $p < 0.001$ .

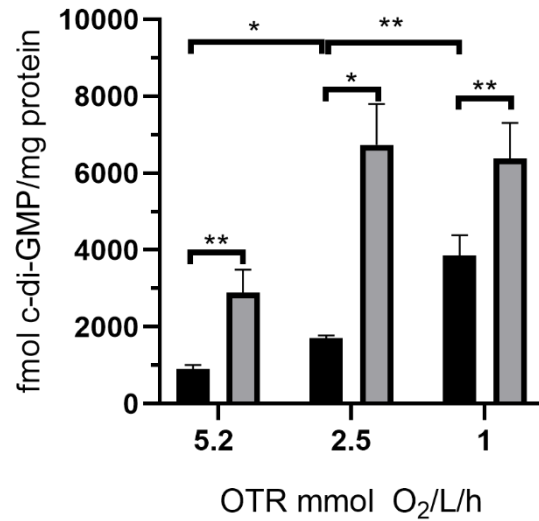

**Figure S3.** c-di-GMP quantification in *A. vinelandii* strains under different OTR<sub>max</sub>. Quantification of c-di-GMP in the AEIV strain (black bars) and the  $\Delta mucG$  mutant (grey bars) cultured in Burk'-sucrose medium for 48 h at the indicated OTR. Means and standard deviation from three independent experiments are shown. Significant differences were analyzed by *t*-test. Statistical significance is indicated (\*  $p < 0.05$  or \*\* $p < 0.01$ ).

**Table S1.** Strains and plasmids used in the present study.

| <b>Name</b>                          | <b>Genotype/Relevant characteristics</b>                                                                                                           | <b>Reference</b> |
|--------------------------------------|----------------------------------------------------------------------------------------------------------------------------------------------------|------------------|
| <b>Strains</b>                       |                                                                                                                                                    |                  |
| AEIV (also named E strain)           | Wild type strain                                                                                                                                   | (2)              |
| ATCC 9046                            | Wild type strain                                                                                                                                   | ATCC collection  |
| <i>Escherichia coli</i> DH5 $\alpha$ | <i>recA1 endA1 hsdR17 supE44 thi-1 gyrA96 relA1D (lacZYA-argF U169 [φ80dlacZDM15] F- Nal<sup>r</sup>)</i>                                          | (3)              |
| CLAM04                               | AEIV derivative in which the <i>mucG</i> gene was deleted and replaced by a Sp <sup>r</sup> cassette ( $\Delta$ <i>mucG</i> ::Sp). Sp <sup>r</sup> | This work        |
| CLAM05                               | CLAM04 derivative, carries ORF Avin_50640 under the control of a $\sigma^{70}$ promoter. Sp <sup>r</sup> Tc <sup>r</sup>                           | This work        |
| CLAM01                               | AEIV derivative, carries a <i>mucG</i> allele with an EAL inactivated domain ( <i>mucG</i> <sup>AAA</sup> ). Sp <sup>r</sup>                       | (4)              |
| CLAM06                               | AEIV derivative, carries a <i>mucG</i> allele with a GGDEF inactivated domain ( <i>mucG</i> <sup>GGAAF</sup> ). Sp <sup>r</sup>                    | This work        |
| CLAM07                               | AEIV derivative, carries ORF Avin_00420 under the control of a $\sigma^{70}$ promoter. Tc <sup>r</sup>                                             | This work        |
| ICM01                                | AEIV derivative, carries a $\Delta$ <i>mucR</i> ::Gm mutation                                                                                      | (5)              |
| CLAM08                               | AEIV derivative in which the Avin_00370 gene was deleted and replaced by a Gm <sup>r</sup> cassette. Gm <sup>r</sup>                               | This work        |
| CLAM09                               | AEIV derivative in which the Avin_00530 gene was deleted and replaced by a Km <sup>r</sup> cassette. Km <sup>r</sup>                               | This work        |
| CLAM10                               | AEIV derivative in which the Avin_04950 gene was deleted and replaced by a Km <sup>r</sup> cassette. Km <sup>r</sup>                               | This work        |
| CLAM11                               | AEIV derivative in which the Avin_05790 gene was deleted and replaced by a Gm <sup>r</sup> cassette. Gm <sup>r</sup>                               | This work        |
| CLAM12                               | AEIV derivative in which the Avin_28640 gene was deleted and replaced by a Gm <sup>r</sup> cassette. Gm <sup>r</sup>                               | This work        |
| CLAM13                               | AEIV derivative in which the Avin_37830 gene was deleted and replaced by a Gm <sup>r</sup> cassette. Gm <sup>r</sup>                               | This work        |
| CLAM14                               | AEIV derivative in which the Avin_38420 gene was deleted and replaced by a Km <sup>r</sup> cassette. Km <sup>r</sup>                               | This work        |

|                  |                                                                                                                                    |           |
|------------------|------------------------------------------------------------------------------------------------------------------------------------|-----------|
| CLAM15           | AEIV derivative in which the Avin_39460 gene was deleted and replaced by a Gm <sup>r</sup> cassette. Gm <sup>r</sup>               | This work |
| CLAM16           | AEIV derivative in which the Avin_44470 gene was deleted and replaced by a Gm <sup>r</sup> cassette. Gm <sup>r</sup>               | This work |
| CLAM17           | AEIV derivative in which the Avin_00420 gene was deleted and replaced by a Gm <sup>r</sup> cassette. Gm <sup>r</sup>               | This work |
| CLAM18           | AEIV derivative in which the Avin_08240 gene was deleted and replaced by a Gm <sup>r</sup> cassette. Gm <sup>r</sup>               | This work |
| CLAM19           | AEIV derivative in which the Avin_11600 gene was partially deleted and replaced by a Gm <sup>r</sup> cassette. Gm <sup>r</sup>     | This work |
| CLAM20           | AEIV derivative in which the Avin_22780 gene was deleted and replaced by a Gm <sup>r</sup> cassette. Gm <sup>r</sup>               | This work |
| CLAM21A          | AEIV derivative in which the Avin_25190 gene was deleted and replaced by a Gm <sup>r</sup> cassette. Gm <sup>r</sup>               | This work |
| CLAM21B          | AEIV derivative in which the Avin_25191 gene was deleted and replaced by a Gm <sup>r</sup> cassette. Gm <sup>r</sup>               | This work |
| CLAM22           | AEIV derivative in which the Avin_29300 gene was partially deleted and replaced by a Km <sup>r</sup> cassette. Km <sup>r</sup>     | This work |
| CLAM23           | AEIV derivative in which the Avin_33420 gene was inactivated by insertion of a Gm <sup>r</sup> cassette. Gm <sup>r</sup>           | This work |
| CLAM24           | AEIV derivative in which the Avin_48220 gene was deleted and replaced by a Gm <sup>r</sup> cassette. Gm <sup>r</sup>               | This work |
| CLAM25           | AEIV derivative in which the Avin_48930 gene was partially deleted and replaced by a Gm <sup>r</sup> cassette. Gm <sup>r</sup>     | This work |
| CLAM26           | AEIV derivative in which the Avin_49060 gene was partially deleted and replaced by a Gm <sup>r</sup> cassette. Gm <sup>r</sup>     | This work |
| CLAM27           | AEIV derivative in which the Avin_51660 gene was partially deleted and replaced by a Km <sup>r</sup> cassette. Km <sup>r</sup>     | This work |
| CLAM28           | AEIV derivative in which the Avin_34930 gene was inactivated by a Gm <sup>r</sup> cassette. Gm <sup>r</sup>                        | This work |
| CLAM29           | AEIV derivative in which the Avin_25160 gene was partially deleted and replaced by a Gm <sup>r</sup> cassette. Gm <sup>r</sup>     | This work |
| CLAM30           | AEIV derivative in which the Avin_50640 gene was partially deleted and replaced by a Gm <sup>r</sup> cassette. Gm <sup>r</sup>     | This work |
| JGAT255          | ATCC9046 derivative in which the Avin_00420 gene was partially deleted and replaced by a Gm <sup>r</sup> cassette. Gm <sup>r</sup> | This work |
| AED- <i>gusA</i> | AEIV derivative carries a chromosomal <i>algD-GusA</i> transcriptional fusion. Gm <sup>r</sup>                                     | (6)       |

|                 |                                                                                                                                                                                                                                                                                                                             |                   |
|-----------------|-----------------------------------------------------------------------------------------------------------------------------------------------------------------------------------------------------------------------------------------------------------------------------------------------------------------------------|-------------------|
|                 |                                                                                                                                                                                                                                                                                                                             |                   |
| <b>Plasmids</b> |                                                                                                                                                                                                                                                                                                                             |                   |
| pJET1.2/Blunt   | Used for subcloning PCR products. Ap <sup>r</sup>                                                                                                                                                                                                                                                                           | Thermo Scientific |
| pHP45Ω          | Source of the Ω Sp <sup>r</sup> cassette                                                                                                                                                                                                                                                                                    | (7)               |
| pBSL98          | Source of the Gm <sup>r</sup> cassette                                                                                                                                                                                                                                                                                      | (8)               |
| pBSL141         | Source of the Km <sup>r</sup> cassette                                                                                                                                                                                                                                                                                      | (8)               |
| pUMATc          | Plasmid used for integration of DNA into the <i>mecA</i> locus of <i>A. vinelandii</i> . Tc <sup>r</sup>                                                                                                                                                                                                                    | (9)               |
| pJG09           | pJET1.2/Blunt derivative carrying a 3.2 kb fragment containing <i>mucG</i> and its regulatory region. Ap <sup>r</sup>                                                                                                                                                                                                       | (4)               |
| pLA05           | pJG09 derivative, in which the <i>mucG</i> gene was deleted by inverse PCR and replaced by a Sp <sup>r</sup> cassette cloned into an artificially generated <i>Bam</i> HI site. This plasmid, previously linearized with <i>Sca</i> I, was used to construct mutant CLAM04 ( $\Delta$ <i>mucG</i> ::Sp).                    | This work         |
| pLA06           | pJET1.2/Blunt derivative carrying a 1439 pb fragment containing the N-terminal portion of the <i>mucG</i> <sup>GGAAF</sup> allele.                                                                                                                                                                                          | This work         |
| pJG103          | pJET1.2/Blunt derivative carrying the entire <i>mucG</i> locus and a Sp <sup>r</sup> cassette immediately downstream as a selection marker.                                                                                                                                                                                 | (4)               |
| pLA06-Sp        | pJG103 derivative carries the <i>mucG</i> <sup>GGAAF</sup> mutated allele. The wild type 4.3 kb <i>Xho</i> I fragment was replaced by that from pLA06 containing the D452A, E453A mutations. Ap <sup>r</sup> , Sp <sup>r</sup> . This plasmid, previously linearized with <i>Sca</i> I was used to construct mutant CLAM06. | This work         |
| pLA07           | pJET1.2/Blunt derivative carrying a 200 pb containing the $\sigma^{70}$ promoter and the ATG codon of the Gm <sup>r</sup> cassette. Ap <sup>r</sup>                                                                                                                                                                         | This work         |
| pLA08           | pJET1.2/Blunt derivative carrying a 1463 pb containing the Avin_00420 coding sequence except for its ATG translation start codon. Ap <sup>r</sup>                                                                                                                                                                           | This work         |
| pLA09           | pLA07 derivative carrying the Avin_00420 ORF under the control of a $\sigma^{70}$ promoter (P $\sigma^{70}$ -Avin_00420). Ap <sup>r</sup> . The Avin_00420 gene was cloned as a <i>Bam</i> HI- <i>Xba</i> I fragment from pLA08.                                                                                            | This work         |
| pLA10           | pUMATc derivative carrying the P $\sigma^{70}$ -Avin_00420 construction from pLA09, released as a <i>Bgl</i> II fragment. Ap <sup>r</sup> , Tc <sup>r</sup> . This plasmid, linearized with <i>Sca</i> I, was used to construct strain CLAM07.                                                                              | This work         |
| pLA11           | pJET1.2/Blunt derivative carrying a 1106 bp fragment containing ORF Avin_50640, except its ATG translation initiation codon. Ap <sup>r</sup>                                                                                                                                                                                | This work         |

|       |                                                                                                                                                                                                                                                                           |           |
|-------|---------------------------------------------------------------------------------------------------------------------------------------------------------------------------------------------------------------------------------------------------------------------------|-----------|
| pLA12 | pLA07 derivative carries the P $\sigma^{70}$ -Avin_50640 construction. The Avin_50640 gene was cloned as a <i>BamHI-XbaI</i> fragment from pLA11. Ap <sup>r</sup>                                                                                                         | This work |
| pLA13 | pUMATc derivative carrying the P $\sigma^{70}$ -Avin_50640 construction from pLA12 released as a <i>BglII</i> fragment. Ap <sup>r</sup> , Tc <sup>r</sup> . This plasmid, linearized with <i>ScaI</i> , was used to construct strain CLAM05.                              | This work |
| pLA14 | pJET1.2/Blunt derivative carrying a 2523 bp fragment containing ORF Avin_00370                                                                                                                                                                                            | This work |
| pLA15 | pJET1.2/Blunt derivative carrying a 2789 bp fragment containing ORF Avin_00530                                                                                                                                                                                            | This work |
| pLA16 | pJET1.2/Blunt derivative carrying a 1662 bp fragment containing ORF Avin_04950                                                                                                                                                                                            | This work |
| pLA17 | pJET1.2/Blunt derivative carrying a 2909 bp fragment containing ORF Avin_05790                                                                                                                                                                                            | This work |
| pLA18 | pJET1.2/Blunt derivative carrying a 3481 bp fragment containing ORF Avin_28640                                                                                                                                                                                            | This work |
| pLA19 | pJET1.2/Blunt derivative carrying a 2917 bp fragment containing ORF Avin_37830                                                                                                                                                                                            | This work |
| pLA20 | pJET1.2/Blunt derivative carrying a 1990 bp fragment containing ORF Avin_38420                                                                                                                                                                                            | This work |
| pLA21 | pJET1.2/Blunt derivative carrying a 2333 bp fragment containing ORF Avin_39460                                                                                                                                                                                            | This work |
| pLA22 | pJET1.2/Blunt derivative carrying a 2418 bp fragment containing ORF Avin_44470                                                                                                                                                                                            | This work |
| pLA23 | pLA14 derivative, in which the Avin_00370 gene was deleted by inverse PCR and replaced by a Gm <sup>r</sup> cassette cloned into an artificially generated <i>BamHI</i> site. This plasmid, previously linearized with <i>ScaI</i> , was used to construct mutant CLAM08. | This work |
| pLA24 | pLA15 derivative, in which the Avin_00530 gene was deleted by inverse PCR and replaced by a Km <sup>r</sup> cassette cloned into an artificially generated <i>BamHI</i> site. This plasmid, previously linearized with <i>ScaI</i> , was used to construct mutant CLAM09. | This work |
| pLA25 | pLA16 derivative, in which the Avin_04950 gene was deleted by inverse PCR and replaced by a Gm <sup>r</sup> cassette cloned into an artificially generated <i>BamHI</i> site. This plasmid, previously linearized with <i>ScaI</i> , was used to construct mutant CLAM10. | This work |
| pLA26 | pLA17 derivative, in which the Avin_05790 gene was deleted by inverse PCR and replaced by a Gm <sup>r</sup> cassette cloned into an artificially generated <i>BamHI</i> site. This plasmid, previously linearized with <i>ScaI</i> , was used to construct mutant CLAM11. | This work |
| pLA27 | pLA18 derivative, in which the Avin_28640 gene was deleted by inverse PCR and replaced by a Gm <sup>r</sup> cassette cloned into an                                                                                                                                       | This work |

|        |                                                                                                                                                                                                                                                                                    |           |
|--------|------------------------------------------------------------------------------------------------------------------------------------------------------------------------------------------------------------------------------------------------------------------------------------|-----------|
|        | artificially generated <i>BamHI</i> site. This plasmid, previously linearized with <i>ScaI</i> , was used to construct mutant CLAM12.                                                                                                                                              |           |
| pLA28  | pLA19 derivative, in which the <i>Avin_37830</i> gene was deleted by inverse PCR and replaced by a Gm <sup>r</sup> cassette cloned into an artificially generated <i>BamHI</i> site. This plasmid, previously linearized with <i>ScaI</i> , was used to construct mutant CLAM13.   | This work |
| pLA29  | pLA20 derivative, in which the <i>Avin_38420</i> gene was deleted by inverse PCR and replaced by a Km <sup>r</sup> cassette cloned into an artificially generated <i>BamHI</i> site. This plasmid, previously linearized with <i>ScaI</i> , was used to construct mutant CLAM14.   | This work |
| pLA30  | pLA21 derivative, in which the <i>Avin_39460</i> gene was deleted by inverse PCR and replaced by a Gm <sup>r</sup> cassette cloned into an artificially generated <i>BamHI</i> site. This plasmid, previously linearized with <i>ScaI</i> , was used to construct mutant CLAM15    | This work |
| pLA31  | pLA22 derivative, in which the <i>Avin_44470</i> gene was deleted by inverse PCR and replaced by a Gm <sup>r</sup> cassette cloned into an artificially generated <i>BamHI</i> site. This plasmid, previously linearized with <i>ScaI</i> , was used to construct mutant CLAM16.   | This work |
| pLA32  | pJET1.2/Blunt derivative carrying a 2338 bp fragment containing ORF <i>Avin_00420</i>                                                                                                                                                                                              | This work |
| pLA33  | pLA32 derivative, in which the <i>Avin_00420</i> gene was deleted by inverse PCR and replaced by a Gm <sup>r</sup> cassette cloned into an artificially generated <i>BamHI</i> site. This plasmid, previously linearized with <i>ScaI</i> , was used to construct mutant CLAM17.   | This work |
| pLA34  | pJET1.2/Blunt derivative carrying a 2307 bp fragment containing ORF <i>Avin_08240</i>                                                                                                                                                                                              | This work |
| pLA35  | pJET1.2/Blunt derivative carrying a 2307 bp fragment containing ORF <i>Avin_11600</i>                                                                                                                                                                                              | This work |
| pLA36  | pJET1.2/Blunt derivative carrying a 1808 bp fragment containing ORF <i>Avin_22780</i>                                                                                                                                                                                              | This work |
| pLA37  | pJET1.2/Blunt derivative carrying a 4683 bp fragment containing ORF <i>Avin_25190</i> and <i>Avin_25191</i>                                                                                                                                                                        | This work |
| pLA38A | pLA37 derivative, in which the <i>Avin_25190</i> gene was deleted by inverse PCR and replaced by a Gm <sup>r</sup> cassette cloned into an artificially generated <i>BamHI</i> site. This plasmid, previously linearized with <i>ScaI</i> , was used to construct mutant CLAM21A.  | This work |
| pLA38B | pLA37 derivative, in which a 2531 pb <i>XhoI-StuI</i> fragment was deleted.                                                                                                                                                                                                        | This work |
| pLA38C | pLA38B derivative, in which the <i>Avin_25191</i> gene was deleted by inverse PCR and replaced by a Gm <sup>r</sup> cassette cloned into an artificially generated <i>BamHI</i> site. This plasmid, previously linearized with <i>ScaI</i> , was used to construct mutant CLAM21B. | This work |



|       |                                                                                                                                                                                                                                                                            |           |
|-------|----------------------------------------------------------------------------------------------------------------------------------------------------------------------------------------------------------------------------------------------------------------------------|-----------|
| pLA39 | pJET1.2/Blunt derivative carrying a 2033 bp fragment containing ORF Avin_29300                                                                                                                                                                                             | This work |
| pLA40 | pJET1.2/Blunt derivative carrying a 1109 bp fragment containing ORF Avin_33420                                                                                                                                                                                             | This work |
| pLA41 | pJET1.2/Blunt derivative carrying a 1946 bp fragment containing ORF Avin_48220                                                                                                                                                                                             | This work |
| pLA42 | pLA41 derivative, in which the Avin_48220 gene was deleted by inverse PCR and replaced by a Gm <sup>r</sup> cassette cloned into an artificially generated <i>Bam</i> HI site. This plasmid, previously linearized with <i>Scal</i> , was used to construct mutant CLAM24. | This work |
| pLA43 | pJET1.2/Blunt derivative carrying a 1783 bp fragment containing ORF Avin_48930                                                                                                                                                                                             | This work |
| pLA44 | pJET1.2/Blunt derivative carrying a 2633 bp fragment containing ORF Avin_49060                                                                                                                                                                                             | This work |
| pLA45 | pJET1.2/Blunt derivative carrying a 2740 bp fragment containing ORF Avin_51660                                                                                                                                                                                             | This work |
| pLA46 | pJET1.2/Blunt derivative carrying a 769 bp fragment containing ORF Avin_34930                                                                                                                                                                                              | This work |
| pLA47 | pJET1.2/Blunt derivative carrying a 2083bp fragment containing ORF Avin_25160                                                                                                                                                                                              | This work |
| pLA48 | pJET1.2/Blunt derivative carrying a 2038 bp fragment containing ORF Avin_50640                                                                                                                                                                                             | This work |
| pLA49 | pLA34 derivative, in which the Avin_08240 gene was partially deleted. A 1301 bp <i>Sal</i> I fragment was replaced by a Gm <sup>r</sup> cassette. This plasmid, previously linearized with <i>Scal</i> , was used to construct mutant CLAM18.                              | This work |
| pLA50 | pLA35 derivative, in which the Avin_11600 gene was partially deleted. A 1643 bp <i>Sph</i> I fragment was replaced by a Gm <sup>r</sup> cassette. This plasmid, previously linearized with <i>Scal</i> , was used to construct mutant CLAM19.                              | This work |
| pLA51 | pLA36 derivative, in which the Avin_22780 gene was deleted. A 1047 bp <i>Sal</i> I- <i>Stu</i> I fragment was replaced by a Gm <sup>r</sup> cassette. This plasmid, previously linearized with <i>Scal</i> , was used to construct mutant CLAM20.                          | This work |
| pLA52 | pLA39 derivative, in which the Avin_29300 gene was partially deleted. A 732 bp <i>Eco</i> RV- <i>Sph</i> I fragment was replaced by a Km <sup>r</sup> cassette. This plasmid, previously linearized with <i>Scal</i> , was used to construct mutant CLAM22.                | This work |
| pLA53 | pLA40 derivative, in which the Avin_33420 gene was inactivated by insertion of a Gm <sup>r</sup> cassette in a <i>Bgl</i> III restriction site. This plasmid, previously linearized with <i>Scal</i> , was used to construct mutant CLAM23.                                | This work |

|             |                                                                                                                                                                                                                                                                               |           |
|-------------|-------------------------------------------------------------------------------------------------------------------------------------------------------------------------------------------------------------------------------------------------------------------------------|-----------|
| pLA54       | pLA43 derivative, in which the Avin_48930 gene was partially deleted. A 954 bp <i>ApaI-SphI</i> fragment was replaced by a Gm <sup>r</sup> cassette. This plasmid, previously linearized with <i>ScaI</i> , was used to construct mutant CLAM25                               | This work |
| pLA55       | pLA44 derivative, in which the Avin_49060 gene was partially deleted. A 1510 bp <i>StuI-SphI</i> fragment was replaced by a Gm <sup>r</sup> cassette. This plasmid, previously linearized with <i>ScaI</i> , was used to construct mutant CLAM26.                             | This work |
| pLA56       | pLA45 derivative, in which the Avin_51660 gene was partially deleted. A 924 bp <i>EcoRI</i> fragment was replaced by a Km <sup>r</sup> cassette. This plasmid, previously linearized with <i>ScaI</i> , was used to construct mutant CLAM27.                                  | This work |
| pLA57       | pLA46 derivative, in which the Avin_34930 gene was inactivated. A <i>EcoRV</i> restriction site was used to introduce a Gm <sup>r</sup> cassette. This plasmid, previously linearized with <i>ScaI</i> , was used to construct mutant CLAM28.                                 | This work |
| pLA58       | pLA47 derivative, in which the Avin_25160 gene was partially deleted. A 3449 bp <i>EcoRI-NdeI</i> fragment was replaced by a Gm <sup>r</sup> cassette. This plasmid, previously linearized with <i>ScaI</i> , was used to construct mutant CLAM29.                            | This work |
| pLA59       | pLA48 derivative, in which the Avin_50640 gene was partially deleted. A 120 bp <i>SmaI</i> fragment was replaced by a Gm <sup>r</sup> cassette. This plasmid, previously linearized with <i>ScaI</i> , was used to construct mutant CLAM30.                                   | This work |
| pJGAT420    | pJET1.2/Blunt derivative carrying a 2338 bp fragment containing ORF Avin_00420                                                                                                                                                                                                | This work |
| pJGAT420-Gm | pJGAT255 derivative, in which the Avin_00420 gene was deleted by inverse PCR and replaced by a Gm <sup>r</sup> cassette cloned into an artificially generated <i>BamHI</i> site. This plasmid, previously linearized with <i>ScaI</i> , was used to construct mutant JGAT255. | This work |

**Table S2.** Oligonucleotides used in the present study.

| Primer Name    | Nucleotide sequence (5'-3')                      | Template           | Used for                                                                                                                                          |
|----------------|--------------------------------------------------|--------------------|---------------------------------------------------------------------------------------------------------------------------------------------------|
| xseB1AhBm-F    | GGACCGTTCGTCCGGATCCAGGG<br>TCTGCCGGCGTTC         | pJG09              | <i>mucG</i> deletion by inverse PCR                                                                                                               |
| mucGD-R        | TGGATCCTCGGCTCAGCATTTGGG<br>GTC                  |                    |                                                                                                                                                   |
| GG9-RT-F       | CAACCGCCACTATCTGGTC                              | pJG09              | Amplification of a 224 bp fragment with the desired mutations (GAC → GCC and GAA → GCG) to construct the <i>mucGGGAAF</i> variant                 |
| GGDEF(GGAAF)-R | CCAGCAGCAGGAGGAACGCGGGCG<br>CCGCCGAGCGGGCCACCAGC |                    |                                                                                                                                                   |
| mucG-R         | GATTGCTCGAAATCGACGGCG                            | pJG09              | Amplification by overlapping PCR of the <i>mucGGGAAF</i> allele using the 224 bp fragment. The 1439 bp product was cloned producing pLA06 plasmid |
| pGm-F          | TTTGCCCATGGACGCACAC                              | pSRK-Gm            | Amplification of the promoter region of the Gm cassette contained in plasmid pLA07                                                                |
| pGmBh1-R2      | AGGATCCCATCGTTGCTGTCCAT<br>AAC                   |                    |                                                                                                                                                   |
| 00420Bh1-F     | TGGATCCTCTATGCCGGTATCTC<br>CC                    | Chromosomal<br>DNA | Amplification of <i>Avin_00420</i> contained in plasmid pLA08                                                                                     |
| 00420-R        | CAGAACGGCTGATCCACATCCC                           |                    |                                                                                                                                                   |
| 50640Bh1-F     | TAGGATCCAAAGCCACCATCCTC<br>GTCGTGG               | Chromosomal<br>DNA | Amplification of <i>Avin_50640</i> contained in plasmid pLA11                                                                                     |
| 50640-R        | CATGTGGGCGCAGATCAAGG                             |                    |                                                                                                                                                   |
| 00370-F        | CATCACGGCATGGTGATCG                              | Chromosomal<br>DNA | Amplification of <i>Avin_00370</i> contained in plasmid pLA14                                                                                     |
| 00370-R        | CGGATTCGAACCGGATGTG                              |                    |                                                                                                                                                   |
| avin00370-FD   | CGGATCCAAACTCTCGCCTACCG                          | pLA14              | <i>Avin_00370</i> deletion by inverse PCR                                                                                                         |
| avin00370-RD2  | TAGGGTCTCTGGGTAAAGTG                             |                    |                                                                                                                                                   |
| avin00530-F    | CGGCCTTGTTGGTAAAAGTC                             | Chromosomal<br>DNA | Amplification of <i>Avin_00530</i> contained in plasmid pLA15                                                                                     |
| avin00530-R    | GGCTATTCGCTGTCCGAACG                             |                    |                                                                                                                                                   |
| avin00530-RD   | GGGATCCGTTCCAATTGACGCATC<br>CAG                  | pLA15              | <i>Avin_00530</i> deletion by inverse PCR                                                                                                         |
| avin00530-FD   | GCGACGAGATCCAGGGTTAC                             |                    |                                                                                                                                                   |
| Avin04950-F    | GACATGGCACTTGCATGAC                              | Chromosomal<br>DNA | Amplification of <i>Avin_04950</i> contained in plasmid pLA16                                                                                     |
| Avin0490-R     | AATAGGCGTACCGCTCGTC                              |                    |                                                                                                                                                   |
| Avin_04950-RD  | AGGATCCAGCAGTTTGGAGCGAT<br>GGTG                  | pLA16              | <i>Avin_04950</i> deletion by inverse PCR                                                                                                         |
| Avin_04950-FD  | ACGAGGATGCCGAGCAGTTG                             |                    |                                                                                                                                                   |
| Avin05790-F    | CTTCAGGGCACCTATGTCTG                             |                    |                                                                                                                                                   |

|              |                                        |                 |                                                        |
|--------------|----------------------------------------|-----------------|--------------------------------------------------------|
| Avin05790-R  | TCGAATACCTGGCGGACAAG                   | Chromosomal DNA | Amplification of Avin_05790 contained in plasmid pLA17 |
| Avin05790-RD | CGAATCCTTCGGGACCGTTG                   |                 |                                                        |
| Avin05790-FD | TGGATCCTCAGCGCTCCTGACCGA<br>ACAG       | pLA17           | Avin_05790 deletion by inverse PCR                     |
| 28640-F      | GCCGTCCAATCGACTAAAC                    | Chromosomal DNA | Amplification of Avin_28640 contained in plasmid pLA18 |
| 28640-R      | GGCAGGTAGAGAAGGTTCC                    |                 |                                                        |
| 28640-RD     | TTCCGCATGTCAGGCACCAC                   |                 |                                                        |
| 28640-FD     | AGGATCCCTGCTCGAGTTCTCCAC<br>AAG        | pLA18           | Avin_28640 deletion by inverse PCR                     |
| 37830-F      | CGGTTCCCTTCGACAAGTTC                   | Chromosomal DNA | Amplification of Avin_37830 contained in plasmid pLA19 |
| 37830-R      | CACCTCGCTCTGCATGTAG                    |                 |                                                        |
| 37830-RD     | AGGATCCACAGCAGTCCGAGCAG<br>AAG         |                 |                                                        |
| 37830-FD     | TCCGCACCATCATCCAGTTG                   | pLA19           | Avin_37830 deletion by inverse PCR                     |
| Avin38420-F  | TGTCGTCTACACTCATGGTG                   | Chromosomal DNA | Amplification of Avin_38420 contained in plasmid pLA20 |
| Avin_38420-R | GTACACGGCCAACCACTTTC                   |                 |                                                        |
| Avin38420-RD | CATGACGAACCGCTGCAGCAACA<br>G           |                 |                                                        |
| Avin38420-FD | TGGATCCCTCTCCAGCGAGCCAA<br>GCACAA      | pLA20           | Avin_38420 deletion by inverse PCR                     |
| 39460-F      | GTCATTGCGGGCTGCAAG                     | Chromosomal DNA | Amplification of Avin_39460 contained in plasmid pLA21 |
| 39460-R      | CTCGTCGGTGACGAACAAGG                   |                 |                                                        |
| 39460-RD     | CCCGGCATGGAAATGGAAC                    |                 |                                                        |
| 39460-FD     | AGGATCCAGCGATCAGGCACTGT<br>ACC         | pLA21           | Avin_39460 deletion by inverse PCR                     |
| Avin44470-F  | ACGGGATTCTGGCCTATC                     | Chromosomal DNA | Amplification of Avin_44470 contained in plasmid pLA22 |
| Avin44470-R  | CTGCGCTATCACTGGCATTAC                  |                 |                                                        |
| Avin44470-RD | TGGATCCGAACTGTACAGGTAGG<br>CGATCAC     |                 |                                                        |
| Avin44470-FD | AAGGCCTGCTACCGGATCTTC                  | pLA22           | Avin_44470 deletion by inverse PCR                     |
| 00420-F      | ACCAGGATCTGTCACTTG                     | Chromosomal DNA | Amplification of Avin_00420 contained in plasmid pLA32 |
| 00420-R2     | ATCCAGTTGCTCGACATCC                    |                 |                                                        |
| 00420-RD     | TCC ATT CTG CGG CCT GTT G              |                 |                                                        |
| 00420-FD     | ACG GAT CCA CCT GCA ACT GAC<br>CGT GAG | pLA32           | Avin_00420 deletion by inverse PCR                     |

|             |                                  |                    |                                                                          |
|-------------|----------------------------------|--------------------|--------------------------------------------------------------------------|
| 08240-F     | AACTGCGCCTGTTGTTTC               | Chromosomal<br>DNA | Amplification of Avin_08240 contained in<br>plasmid pLA34                |
| 08240-R     | CGGTGGAATACCGCATAG               |                    |                                                                          |
| 11600-F     | GGCCAAGCTGGAATCCATC              | Chromosomal<br>DNA | Amplification of Avin_11600 contained in<br>plasmid pLA35                |
| 11600-R     | ATCGAGCTTGCCGAGGTTG              |                    |                                                                          |
| 22780-F     | CCCATGGCTACACCTACTC              | Chromosomal<br>DNA | Amplification of Avin_22780 contained in<br>plasmid pLA36                |
| 22780-R2    | TCTTCCAGTCCGGTATG                |                    |                                                                          |
| 25190-F     | TCCCGAATTGGACAAAGC               | Chromosomal<br>DNA | Amplification of Avin_25190 and<br>Avin_25191 contained in plasmid pLA37 |
| 25190-R     | CCAACTTCGCGACAGTTTC              |                    |                                                                          |
| 25190-RD    | CATGCAGCGGAATCACAG               | pLA37              | Avin_25190 deletion by inverse PCR                                       |
| 25190(A)-FD | ACGGATCCTCTTGGAGGGCTGTCTG<br>TAG |                    |                                                                          |
| 25190-FD    | AGGATCCACGGGAGTGACGAGTA<br>TG    | pLA38B             | Avin_25191 deletion by inverse PCR                                       |
| 25190-RD    | CATGCAGCGGAATCACAG               |                    |                                                                          |
| 29300-F     | GCATGAATGCGCACATCG               | Chromosomal<br>DNA | Amplification of Avin_29300 contained in<br>plasmid pLA39                |
| 29300-R     | TGTACGGCCTGTTTCAGGAG             |                    |                                                                          |
| 33420-F     | CTCCAGGAGCCGGTATATG              | Chromosomal<br>DNA | Amplification of Avin_33420 contained in<br>plasmid pLA40                |
| 33420-R     | AAGTCTCGCTCGTCACTTC              |                    |                                                                          |
| 48220-F     | ACGACCTGACTCAGTACC               | Chromosomal<br>DNA | Amplification of Avin_48220 contained in<br>plasmid pLA41                |
| 48220-R     | GACTATACCGGCTTCAAC               |                    |                                                                          |
| 48220-DR    | TAAAGCTCCGCTCCGACTG              | pLA41              | Avin_48220 deletion by inverse PCR                                       |
| 48220-DF    | TGGATCCTCAGTTAGGGCGGAAG<br>CTC   |                    |                                                                          |
| 48930-F     | CCAGATCATGGCGCACTAC              | Chromosomal<br>DNA | Amplification of Avin_48930 contained in<br>plasmid pLA43                |
| 48930-R     | GGCGGGTATCGTTGTAGAC              |                    |                                                                          |
| 49060-F     | CGCTGACCACGATCAAATG              | Chromosomal<br>DNA | Amplification of Avin_49060 contained in<br>plasmid pLA44                |
| 49060-R     | ATTGCCGATCAGCGGGATCGAC           |                    |                                                                          |
| 51660-F     | CGATCTCACGGTCATCAG               | Chromosomal<br>DNA | Amplification of Avin_51660 contained in<br>plasmid pLA45                |
| 51660-R     | GAGCAGCTCCTTGAGTTC               |                    |                                                                          |
| 34930-FBh   | TGGATCCTTGCTGGCCCTGCTCGA<br>GGG  | Chromosomal<br>DNA | Amplification of Avin_34930 contained in<br>plasmid pLA46                |
| 34930-R     | ACATTCTAGCCCGCTGTCTCG            |                    |                                                                          |
| 25160-F     | CTGAGCCAATTCCTGAAC               | Chromosomal<br>DNA | Amplification of Avin_25160 contained in<br>plasmid pLA47                |
| 25160-R     | CAGGTGTTCTGGTACTC                |                    |                                                                          |

|             |                                        |                                |                                                              |
|-------------|----------------------------------------|--------------------------------|--------------------------------------------------------------|
| 50640-F     | ATCGCCCATACCCTCAAG                     | Chromosomal<br>DNA             | Amplification of Avin_50640 contained in<br>plasmid pLA48    |
| 50640-R     | CTGTTCGTCAGCCACTTG                     |                                |                                                              |
| 00420-F     | ACCAGGATCTGTCACTTG                     | ATCC9046<br>Chromosomal<br>DNA | Amplification of Avin_00420 contained in<br>plasmid pJGAT255 |
| 00420-R2    | ATCCAGTTGCTCGACATCC                    |                                |                                                              |
| 00420-RD    | TCC ATT CTG CGG CCT GTT G              | pJGAT255                       | Avin_00420 deletion by inverse PCR                           |
| 00420-FD    | ACG GAT CCA CCT GCA ACT GAC<br>CGT GAG |                                |                                                              |
| qgyrAL-F    | CAA GCT GGC CCA TGA ACT GCT<br>C       |                                | qRT-PCR assay                                                |
| qgyrAL-R    | TGG GAA TCC TGG TCG GCA TCA<br>C       |                                | qRT-PCR assay                                                |
| qPCR-mucG-F | TCG ACC GAA CCC GTT TCG AG             |                                | qRT-PCR assay                                                |
| qPCR-mucG-R | GAT CAG GCG GTG GTA GAG AC             |                                | qRT-PCR assay                                                |

## References

1. Solovyev V, Salamov A. 2011. Automatic Annotation of Microbial Genomes and Metagenomic Sequences, in *Metagenomics and its Applications in Agriculture, Biomedicine and Environmental Studies* (ed. Li, R. W.) (Nova Science Publishers), 61-78.
2. Larsen B, Haug A. 1971. Biosynthesis of alginate: Part I. Composition and structure of alginate produced by *Azotobacter vinelandii* (Lipman). *Carbohydr Res* 17:287–296.
3. Hanahan D. 1983. Studies on transformation of *Escherichia coli* with plasmids. *J Mol Biol* 166:557–580.
4. Ahumada-Manuel CL, Guzmán J, Peña C, Quiroz-Rocha E, Espín G, Núñez C. 2017. The signaling protein MucG negatively affects the production and the molecular mass of alginate in *Azotobacter vinelandii*. *Appl Microbiol Biotechnol* 101:1521–1534.
5. Martinez-Ortiz IC, Ahumada-Manuel CL, Hsueh B, Guzmán J, Moreno S, Espín G, Cocotl-Yañez M, Waters C, Núñez C. accepted. Cyclic-di-GMP-mediated regulation of extracellular mannuronan C-5 epimerases is essential for cyst formation in *Azotobacter vinelandii*. *J Bacteriol*.
6. Quiroz-Rocha E, Bonilla-Badía F, García-Aguilar V, López-Pliego L, Serrano-Román J, Cocotl-Yañez M, Guzmán J, Ahumada-Manuel CL, Muriel-Millán LF, Castañeda M, Espín G, Nuñez C. 2017. Two-component system CbrA/CbrB controls alginate production in *Azotobacter vinelandii*. *Microbiology*, 163:1105–1115.

7. Fellay R, Frey J, Krisch H. 1987. Interposon mutagenesis of soil and water bacteria: a family of DNA fragments designed for *in vitro* insertional mutagenesis of Gram-negative bacteria. *Gene* 52:147–154.
8. Alexeyev MF, Shokolenko IN, Croughan TP. 1995. Improved antibiotic-resistance gene cassettes and omega elements for *Escherichia coli* vector construction and *in vitro* deletion/insertion mutagenesis. *Gene* 160:63–67.
9. Cocotl-Yañez M, Moreno S, Encarnación S, López-Pliego L, Castañeda M, Espín G. 2014. A small heat-shock protein (Hsp20) regulated by RpoS is essential for cyst desiccation resistance in *Azotobacter vinelandii*. *Microbiology*, 160:479–487.
